# Supplementary material for: Carbon dioxide hydrogenation to aromatic hydrocarbons by using an iron/iron oxide nanocatalyst
Source: PubMed Central journal article supplement (PMC4077464; doi:10.3762/bjnano.5.88), 2014-06-02
Supplement: Beilstein_J_Nanotechnol-05-760-s001.pdf [file Beilstein_J_Nanotechnol-05-760-s001.pdf]

## **Supporting Information**

for

# **Carbon dioxide hydrogenation to aromatic hydrocarbons by using an iron/iron oxide nanocatalyst**

Hongwang Wang\*<sup>1</sup>, Jim Hodgson<sup>1</sup>, Tej B. Shrestha<sup>2</sup>, Prem S. Thapa<sup>3</sup>, David Moore<sup>3</sup>, Xiaorong Wu<sup>4</sup>,  
Myles Ikenberry<sup>5</sup>, Deryl L. Troyer<sup>2</sup>, Donghai Wang<sup>4</sup>, Keith L. Hohn<sup>5</sup> and Stefan H. Bossmann\*<sup>1</sup>

Address: <sup>1</sup>Kansas State University, Department of Chemistry, 201CBC Building, Manhattan, KS 66506, USA, 001-785-532-6817; <sup>2</sup>Kansas State University, Department of Anatomy & Physiology, 130 Coles Hall, Manhattan, KS 66506, USA; <sup>3</sup>University of Kansas, Microscopy and Analytical Imaging Laboratory, 1043 Haworth, Lawrence, KS 66045, USA; <sup>4</sup>Kansas State University, Department of Biological and Agricultural Engineering, 150 Seaton Hall, Manhattan, KS 66506, USA and <sup>5</sup>Kansas State University, Department of Chemical Engineering, 1016 Durland Hall, Manhattan, KS 66506, USA

Email: Hongwang Wang\* - hongwang@ksu.edu; Stefan H. Bossmann\* - sbossmann@ksu.edu

\*Corresponding author

## **Additional experimental data**

## Reaction kinetics

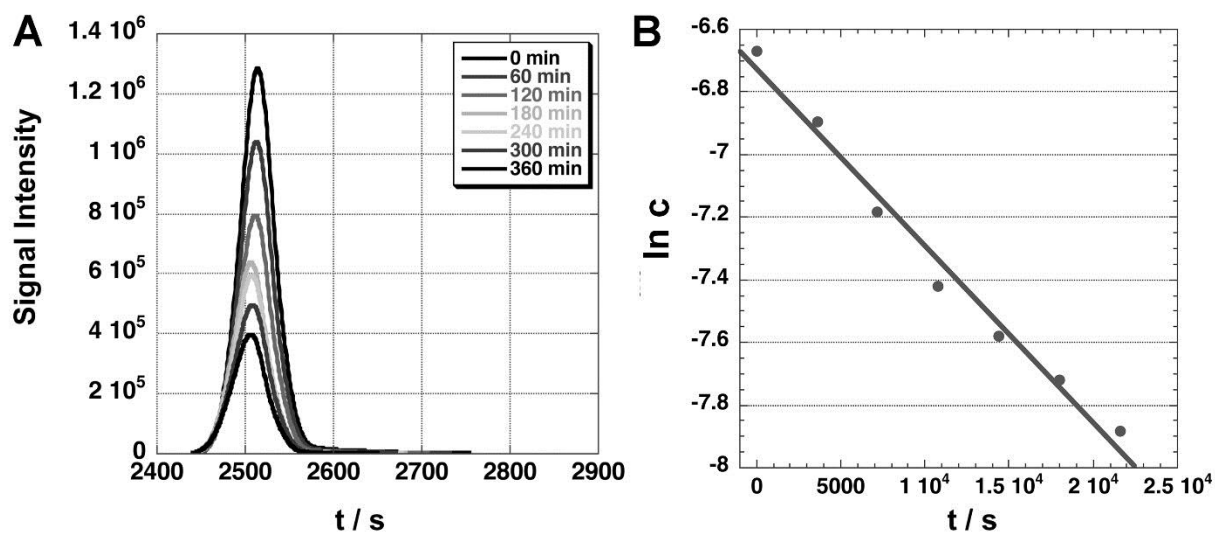

**Figure S1:** Consumption of CO<sub>2</sub> at 400 °C. A: CO<sub>2</sub> peak as a function of reaction time, as recorded by GC-MS. B: The reaction is a heterogeneous first order kinetics, as the plot  $\ln(\text{signal intensity})$  vs  $t$  indicates.

## Additional GC-MS chromatograms and mass spectra

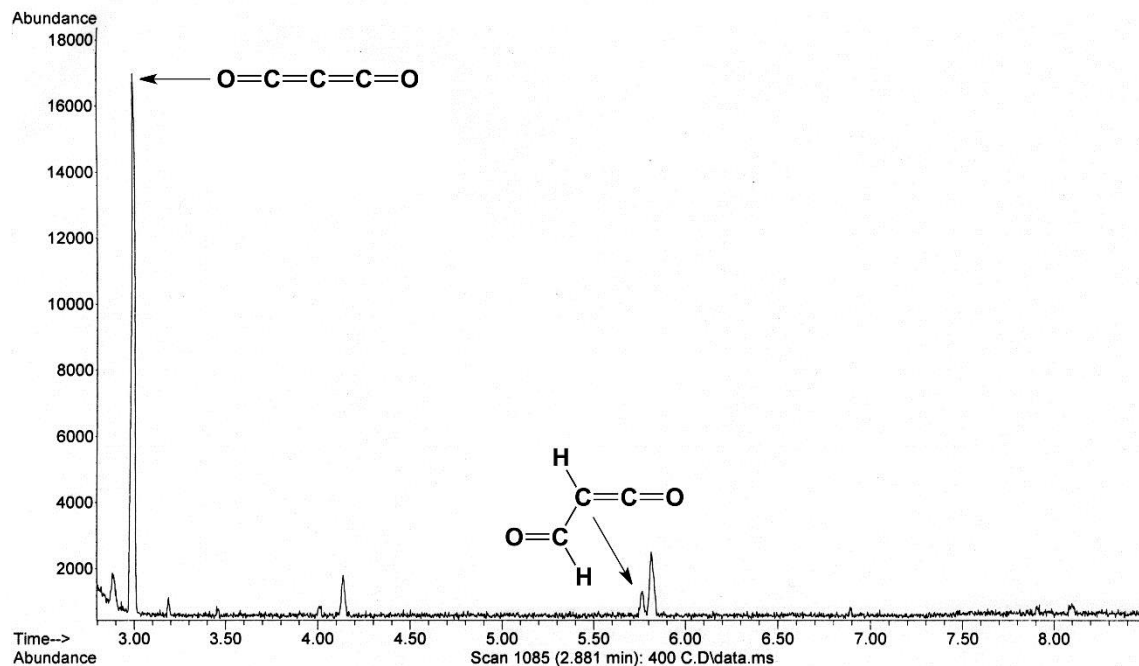

Figure S2: GC-MS chromatogram showing the major reaction intermediates that are formed at 400 °C.

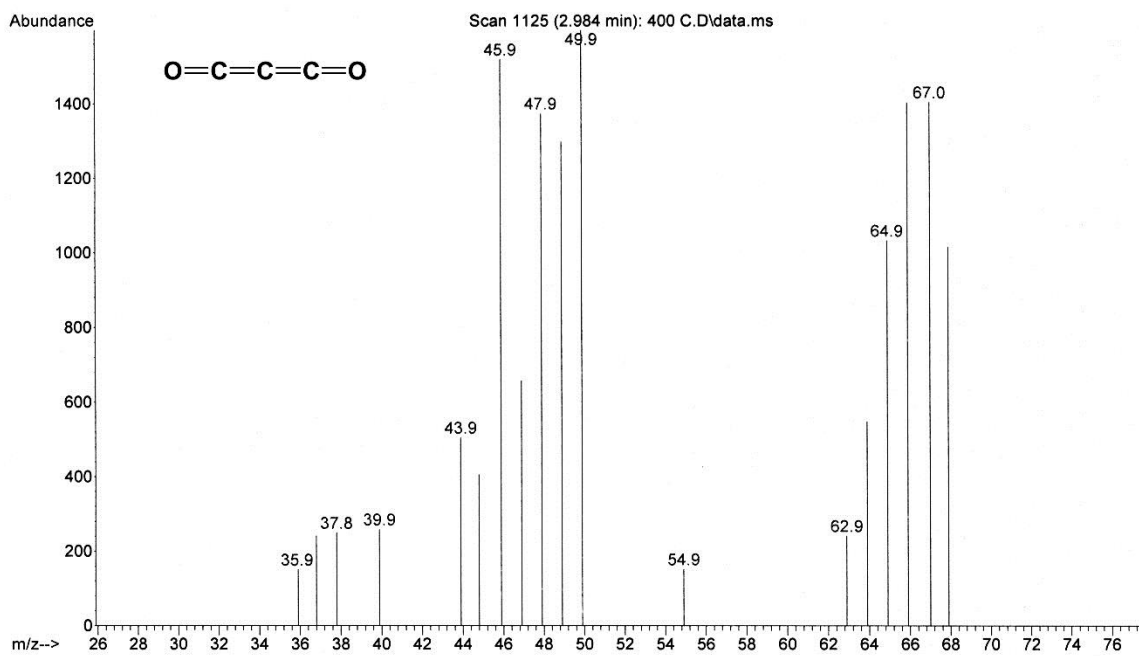

Figure S3: Mass spectrum of carbon suboxide ( $C_3O_2$ ).

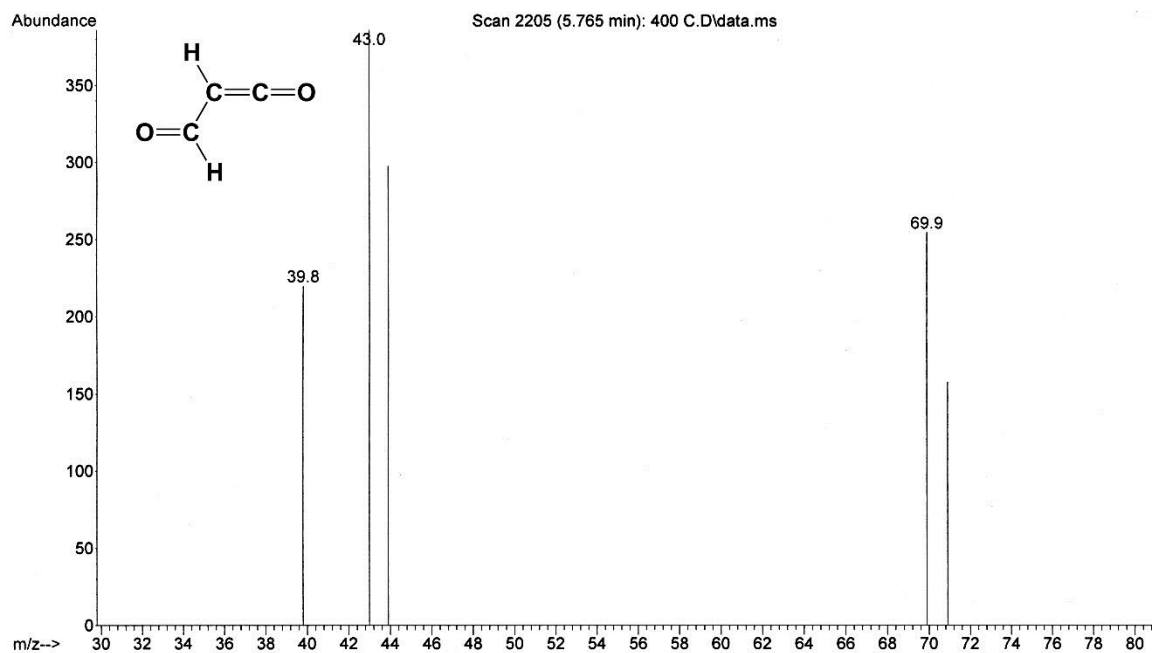

Figure S4: Mass spectrum of 3-oxoacrylaldehyde ( $C_3H_2O_2$ ).

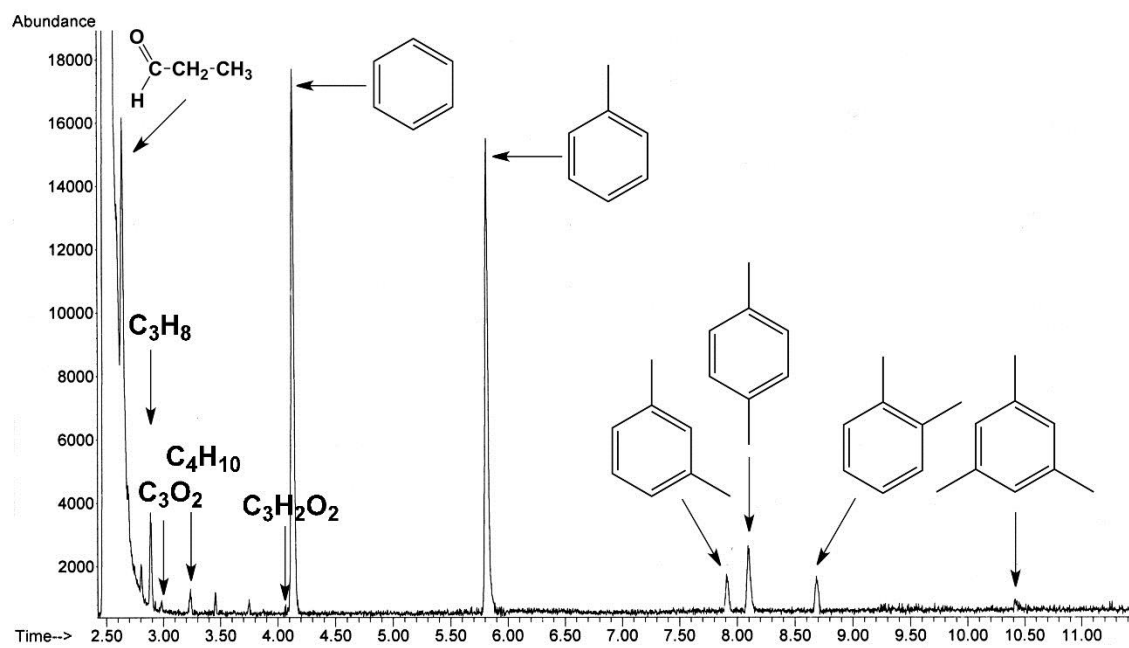

Figure S5: GC-MS chromatogram showing the major reaction products that are formed at 500 °C.

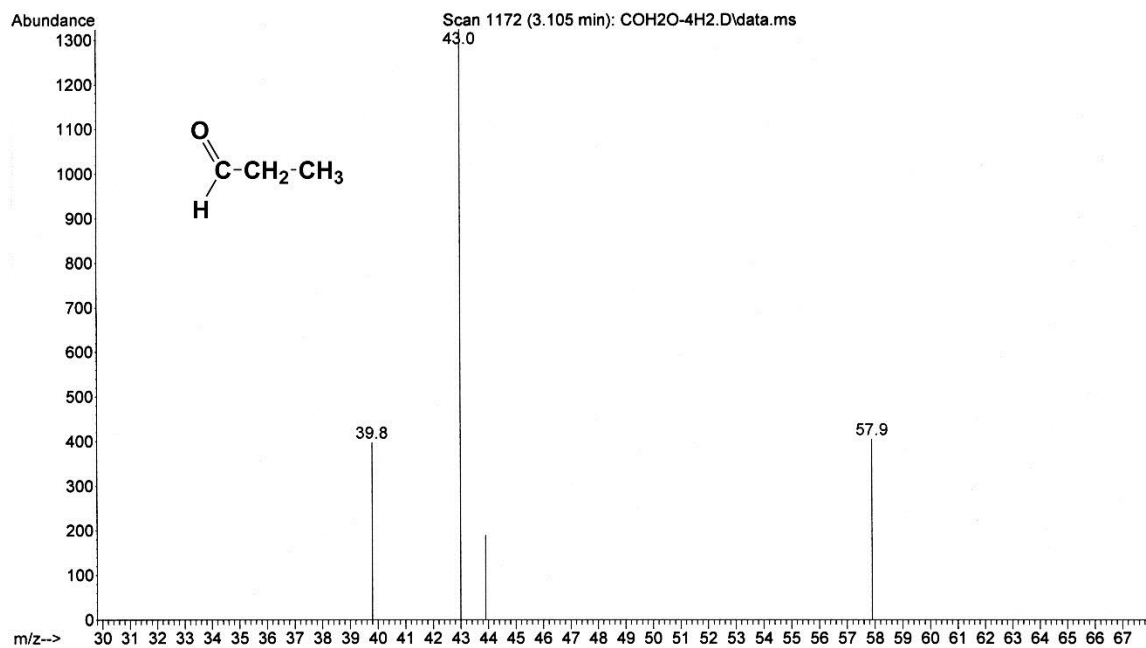

**Figure S6:** Mass spectrum of propionaldehyde ( $C_3H_6O$ ).

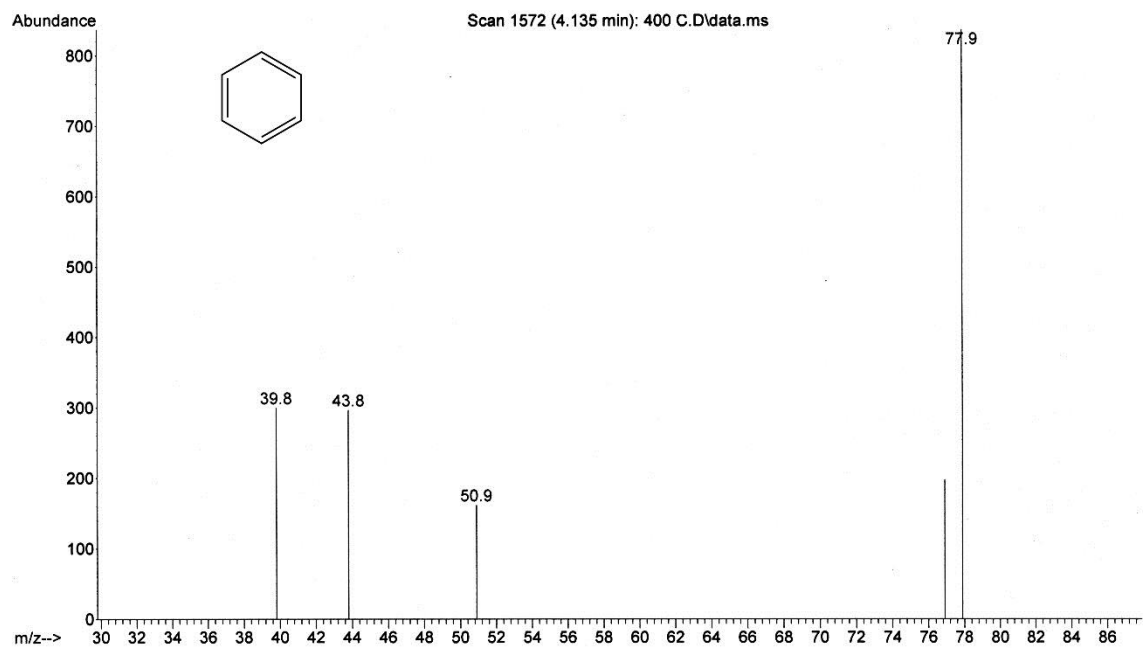

**Figure S7:** Mass spectrum of benzene ( $C_6H_6$ ).

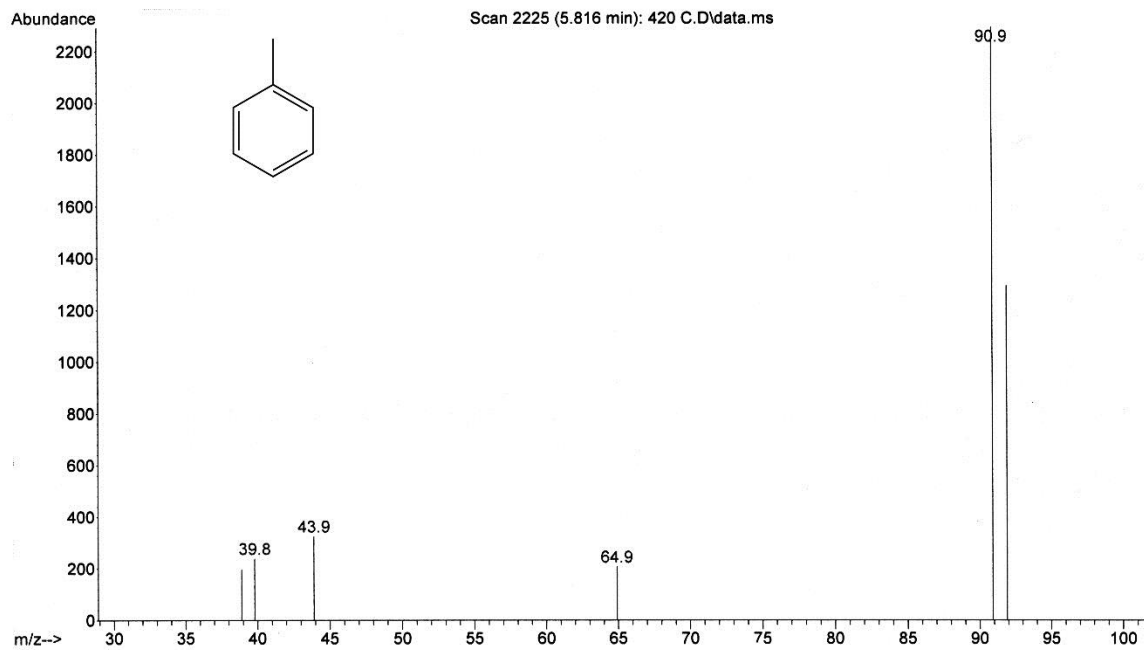

**Figure S8:** Mass spectrum of toluene ( $C_7H_8$ ).

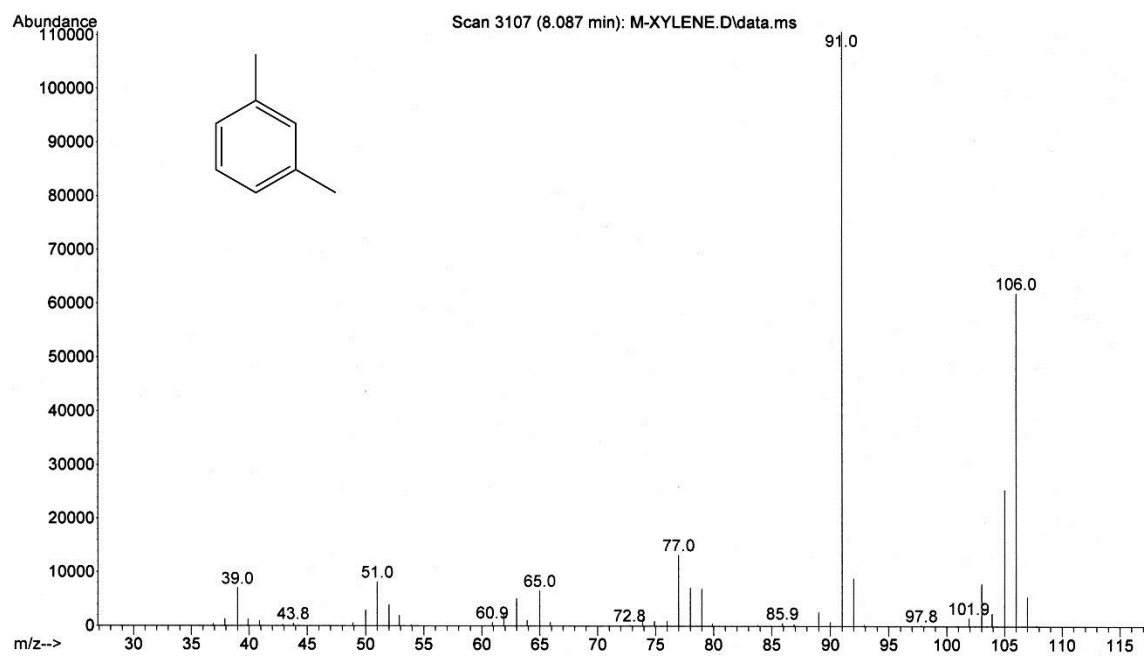

**Figure S9:** Mass spectrum of *meta*-xylene ( $C_8H_{10}$ ).

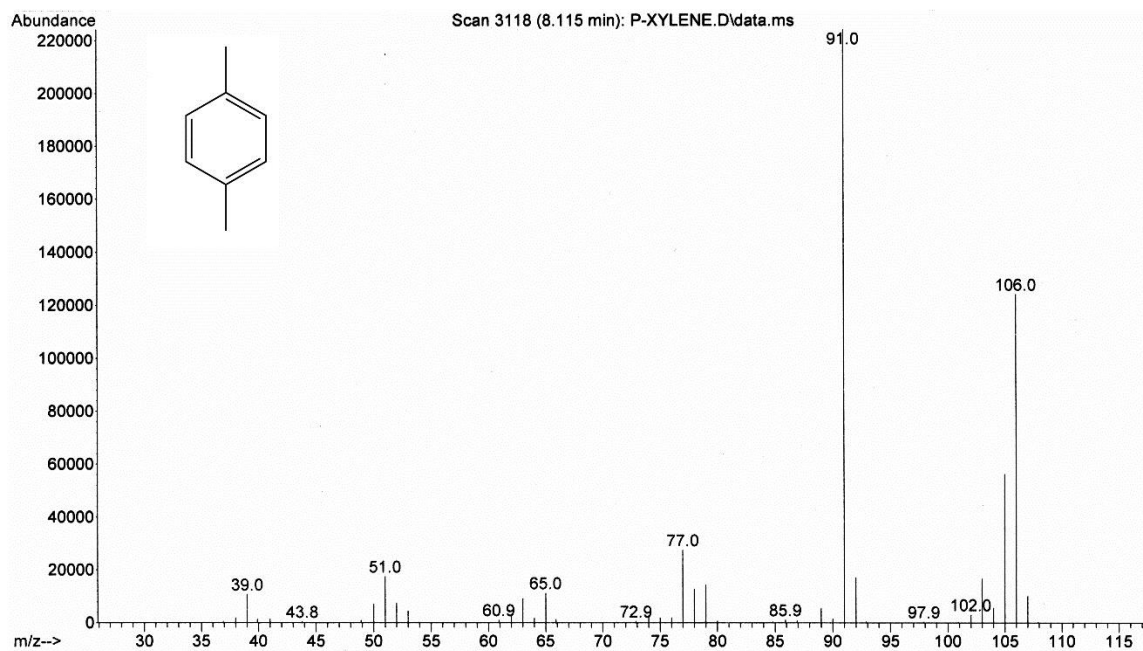

**Figure S10:** Mass spectrum of *para*-xylene ( $C_8H_{10}$ ).

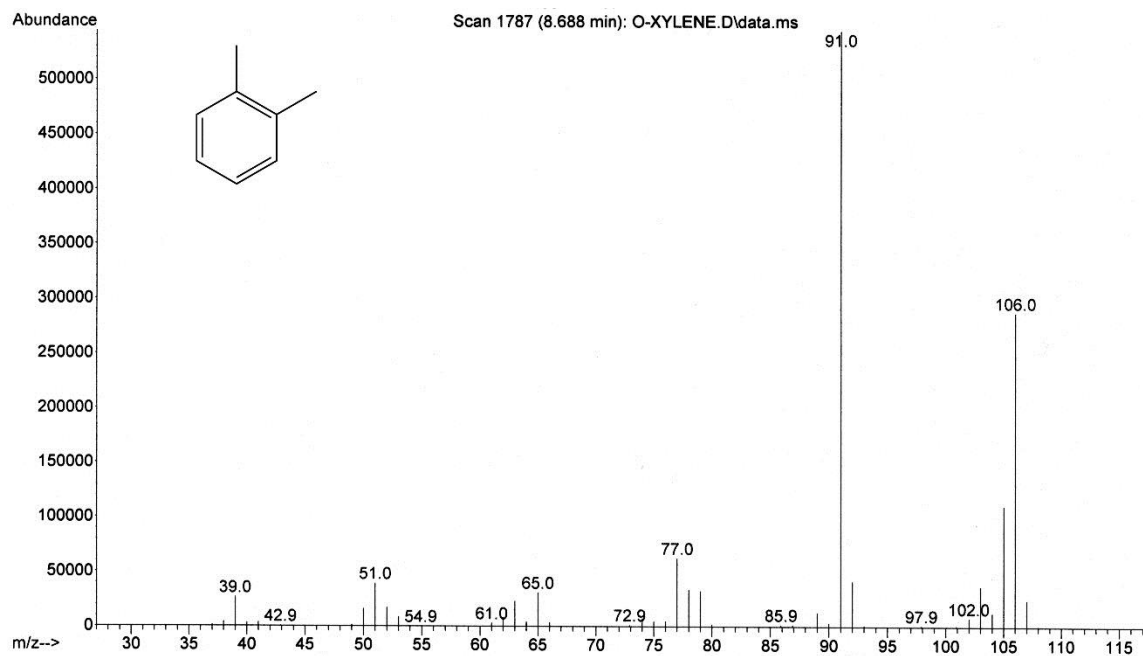

**Figure S11:** Mass spectrum of *ortho*-xylene ( $C_8H_{10}$ ).

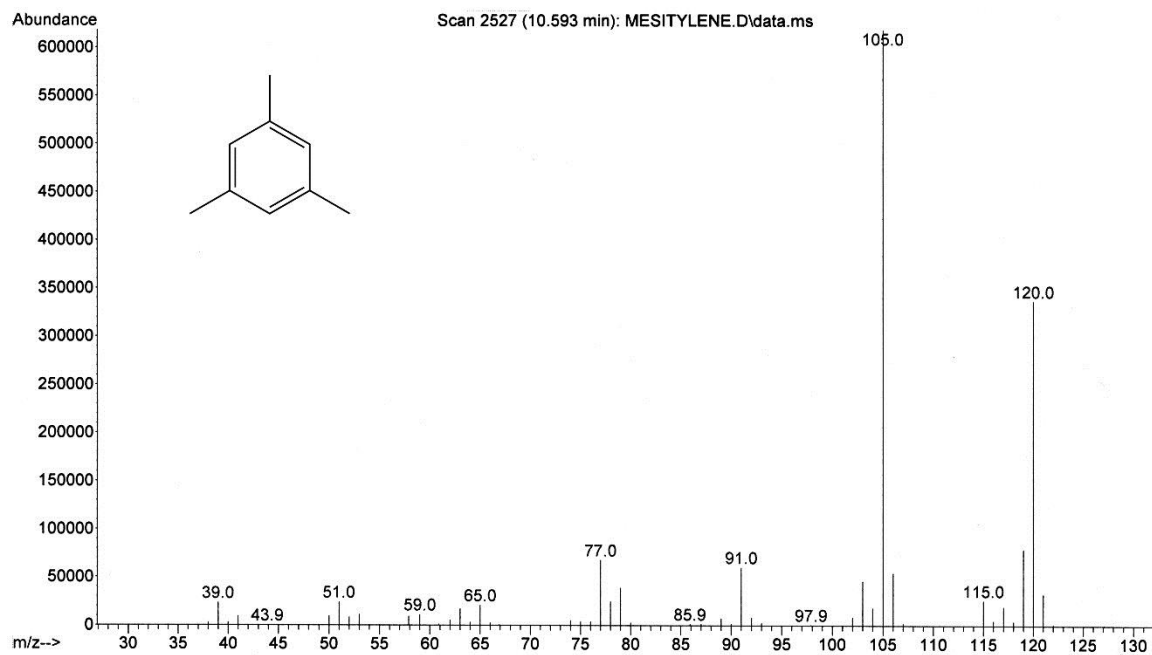

**Figure S12:** Mass spectrum of mesitylene ( $C_9H_{12}$ ).



## Additional XRD Spectra

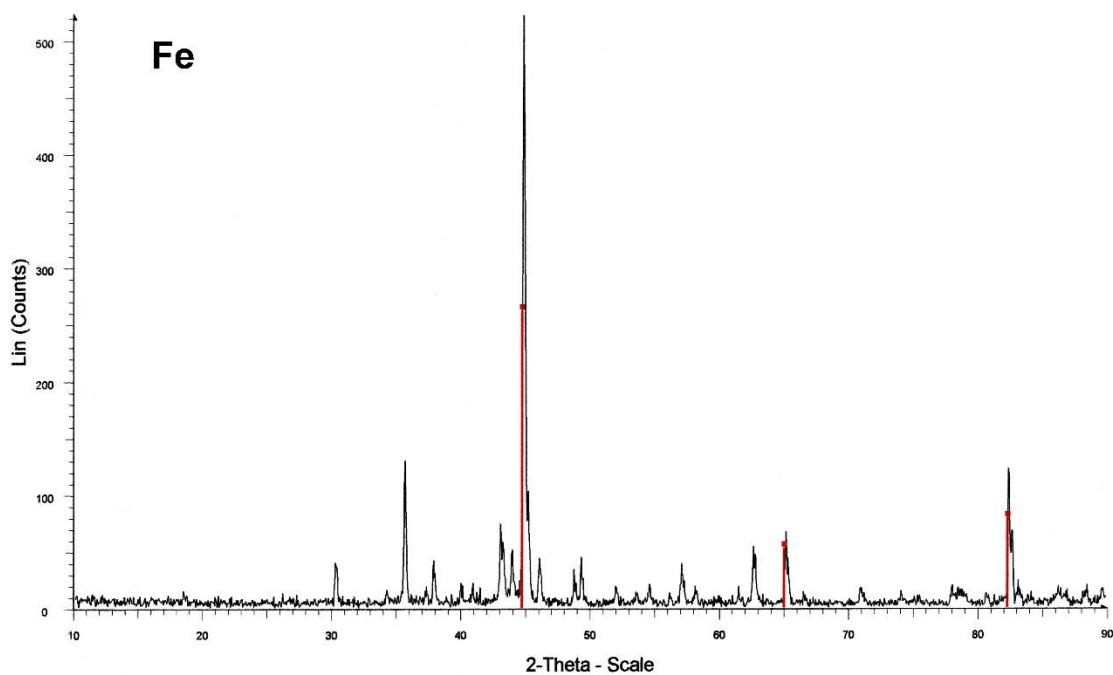

**Figure S13:** X-ray diffractogram of the Fe/Fe<sub>3</sub>O<sub>4</sub>-catalyst after 5 catalytic runs (2 h each).

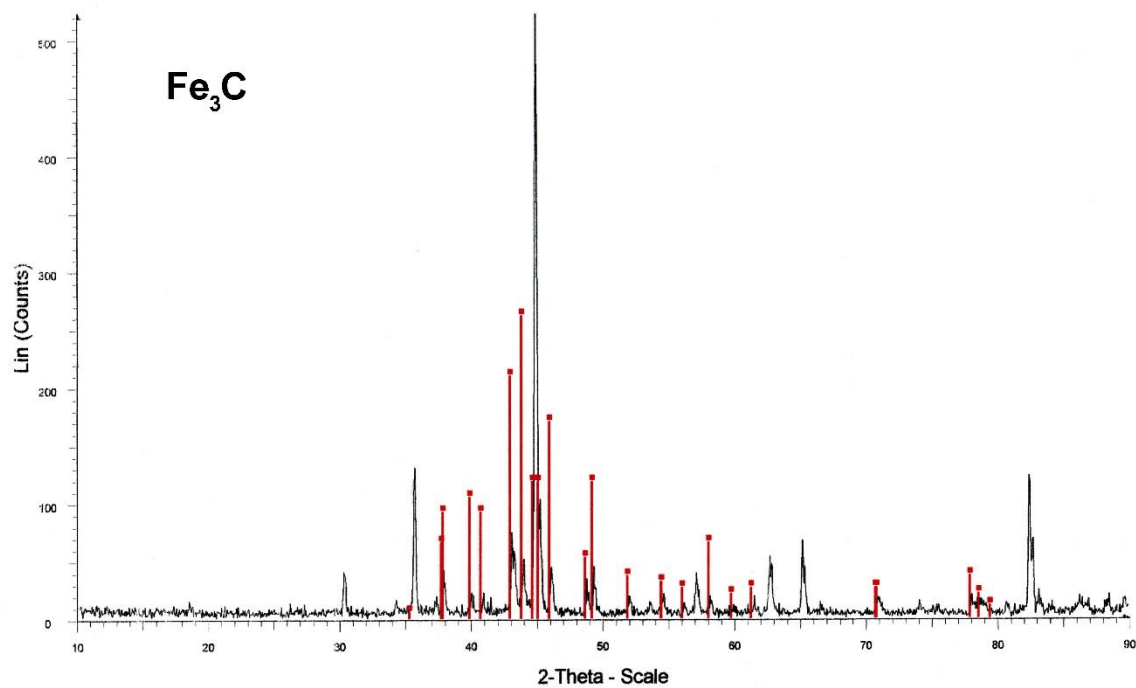

**Figure S14:** X-ray diffractogram of the Fe/Fe<sub>3</sub>O<sub>4</sub>-catalyst after 5 catalytic runs (2 h each).

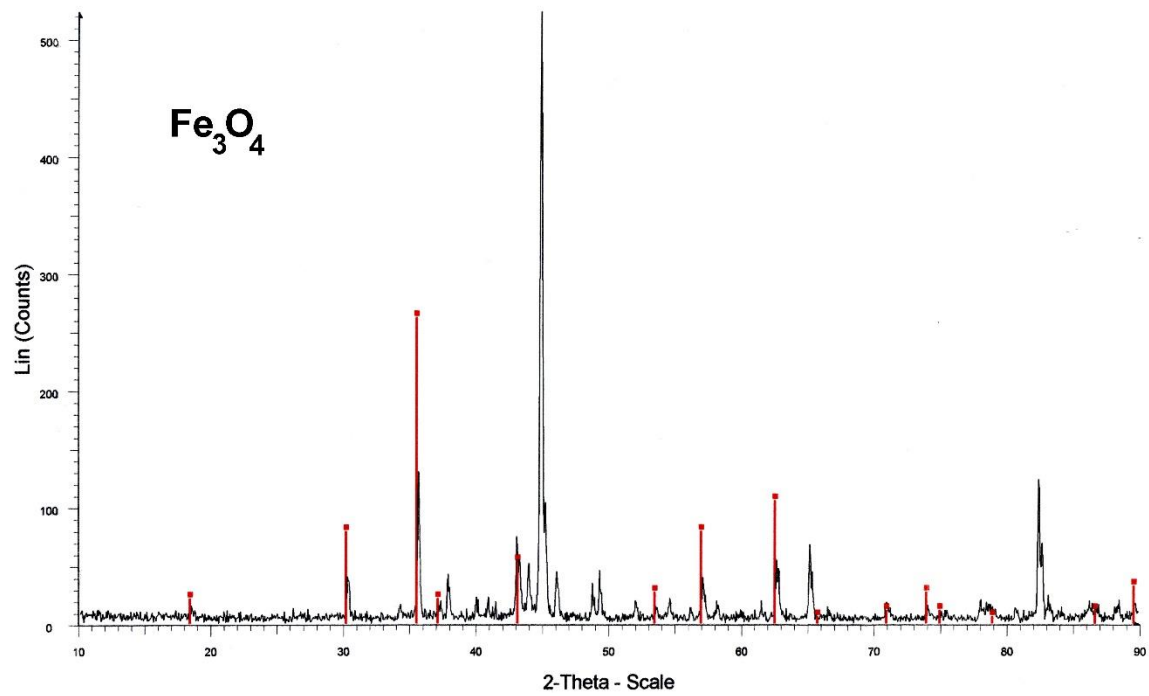

**Figure S15:** X-ray diffractogram of the Fe/Fe<sub>3</sub>O<sub>4</sub>-catalyst after 5 catalytic runs (2 h each).
